# Supplementary material
Source: HighWire-hosted journal article supplement (https://jitc.bmj.com/content/2/1/1)
Supplement: media-4 [file media-4.pdf]

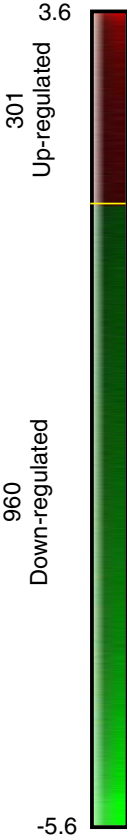

10 highly up-regulated immune-related genes\*

|                                                                                    |               |
|------------------------------------------------------------------------------------|---------------|
| • CXCL10                                                                           | 3.5574        |
| • <b>CD80 (B7-1)</b>                                                               | <b>2.1815</b> |
| • MxA=interferon-induced cellular resistance mediator protein                      | 2.0231        |
| • Apolipoprotein A-II                                                              | 1.9726        |
| • Lysosomal-associated membrane protein 3                                          | 1.8604        |
| • Interferon-induced, hepatitis C-associated microtubular aggregate protein (44kD) | 1.8286        |
| • Synaptotagmin XIII                                                               | 1.6388        |
| • CCL7                                                                             | 1.5788        |
| • SMA5                                                                             | 1.5483        |
| • Interferon-induced protein with tetratricopeptide repeats 2                      | 1.5166        |

10 highly down-regulated immune-related genes\*

|                                                |                |
|------------------------------------------------|----------------|
| • Hsp70B                                       | -3.1740        |
| • Chondroitin sulfate proteoglycan 2           | -3.1265        |
| • <b>ILT2 (MIR-7)</b>                          | <b>-2.9490</b> |
| • BAG3 (BCL2-associated athanogene 3)          | -2.5571        |
| • Tissue inhibitor of metalloproteinase 1      | -2.3051        |
| • C/EBP-beta                                   | -2.2039        |
| • Cathepsin S                                  | -2.1264        |
| • Dual specificity phosphatase 6               | -1.9829        |
| • Lysosomal-associated membrane protein 1      | -1.6730        |
| • Insulin-like growth factor binding protein 4 | -1.5713        |
